# Supplementary material
Source: PubMed Central journal article supplement (PMC6570449)
Supplement: JGMED18008121.pdf [file JGMED18008121.pdf]

Dueker JM, Luty J, Perry DA, Izumi S, Fromme EK, DiVeronica M. A resident-led initiative to increase documentation of surrogate decision makers for hospitalized patients. *J Grad Med Educ.* 2019;11(3):295–300.

## **Supplemental Material**

### *Core GME Programs:*

1. Anesthesiology
2. Dermatology
3. Diagnostic Radiology
4. Emergency Medicine
5. Family Medicine
6. Internal Medicine
7. Neurological Surgery
8. Neurology
9. OB/Gyn
10. Ophthalmology
11. Orthopedic Surgery
12. Otolaryngology
13. Pathology
14. Pediatrics
15. Plastic Surgery
16. Preventative Medicine
17. Psychiatry
18. Radiation Oncology
19. Surgery
20. Urology

### *Admitting Service Specialties:*

1. Family medicine
2. Internal Medicine (included non-teaching attending admissions)

Dueker JM, Luty J, Perry DA, Izumi S, Fromme EK, DiVeronica M. A resident-led initiative to increase documentation of surrogate decision makers for hospitalized patients. *J Grad Med Educ.* 2019;11(3):295–300.

3. Neurological Surgery

4. Neurology

5. Obstetrics and Gynecology

6. Orthopedic Surgery

7. Surgery (multiple services included - Emergency General, Oncology, Cardiothoracic, Foregut, Midgut, and Hindgut Surgical Services)

8. Urology
